# Supplementary material for: Nanoliposomes from Agro-Resources as Promising Delivery Systems for Chondrocytes
Source: Int J Mol Sci. 2020 May 13;21(10):3436. doi: 10.3390/ijms21103436 (PMC7279141; doi:10.3390/ijms21103436)
Supplement: Supplementary file 1 [file ijms-21-03436-s001.pdf]

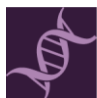

**Table S1.** Impact of electroporation on chondrocyte survivability.

| Conditions | 1% FCS    | 10% FCS   | 15% FCS   |
|------------|-----------|-----------|-----------|
| No Plasmid | 100 ± 3   | 100 ± 4   | 100 ± 2   |
| 500 ng     | 50 ± 9 *  | 65 ± 7 *  | 70 ± 5 ** |
| 1 µg       | 48 ± 8 *  | 51 ± 11 * | 62 ± 7 *  |
| 2 µg       | 40 ± 5 ** | 48 ± 7 *  | 61 ± 8 *  |

Rat chondrocytes were electroporated with plasmids encoding pCMV Renilla luciferase before electroporation using a Nucleofector kit (Amaxa/Lonza) according to the manufacturer's protocol. Briefly,  $3 \times 10^6$  cells were gently mixed with 0.5, 1, or 2 µg of plasmid and immediately after transfection, cells were split equally into three wells containing 1%, 10%, or 15% fetal calf serum (FCS)-DMEM/Ham's F-12 supplemented with L-glutamine (2 mM), penicillin (100 U/mL), streptomycin (100 µg/mL), left to recover for 24 h. Metabolic activity was assessed using the MTT assay. The cell metabolic activity results are presented in % versus control results (as 100%). The results shown are mean ± SD of at least four individual experiments. \*  $p < 0.01$  and \*\*  $p < 0.001$  compared to control for each % FCS with no plasmid.
